# Supplementary material for: Structure–property relationship of novel supramolecular gels based on coumarins
Source: Royal Society of Chemistry journal article supplement (doi:10.1039/d1nj01784e), 2021-01-01

## SUPPLEMENTARY INFORMATION

### New Journal of Chemistry

Structure-property relationship of novel supramolecular gels based on coumarins

Jesús Roberto Márquez-Gutiérrez,<sup>a</sup> Juan Pablo Mojica-Sánchez,<sup>b</sup> Elizabeth G. Macias-López,<sup>a</sup> Francisco J. Martínez-Martínez,<sup>a</sup> Nancy Evelyn Magaña-Vergara,<sup>\*a</sup> Néstor Mendoza-Muñoz,<sup>\*a</sup>

---

<sup>a</sup> *Facultad de Ciencias Químicas. Universidad de Colima, Km 9 Carretera Colima-Coquimatlán, Coquimatlán, Colima. C.P. 28400, México.*  
Corresponding E-mails: [nmendoza@ucol.mx](mailto:nmendoza@ucol.mx) (N. M.-M.), [nancymv@ucol.mx](mailto:nancymv@ucol.mx) (Catedrática CONACyT, N.E.M.-V.)

<sup>b</sup> *Tecnológico Nacional de México. Instituto Tecnológico José Mario Molina Pasquel y Henríquez Campus Tamazula de Gordiano, Carretera Tamazula-Santa Rosa No. 329, 49650 Tamazula de Gordiano, Jalisco, México.*

CONTENTS

PAGE

Spectroscopic Characterization of:

**1a**

| Parámetro                 | Valor                                                                                                                                        |
|---------------------------|----------------------------------------------------------------------------------------------------------------------------------------------|
| 1 Data File Name          | E:/ Cesar Villa/ Documents/ Posgrado/ Proyecto de posgrado/ Espectros de cumarinas/ Revisar 160519/ CAVM- Cum-Etox-H - 160519 - Copy/ 1/ fid |
| 2 Title                   | CAVM-Cum-Etox-H - 160519 - Copy                                                                                                              |
| 3 Comment                 | 1H-CAVM                                                                                                                                      |
| 4 Origin                  | Bruker Biospin GmbH                                                                                                                          |
| 5 Owner                   | ARO                                                                                                                                          |
| 6 Site                    |                                                                                                                                              |
| 7 Spectrometer            | spect                                                                                                                                        |
| 8 Author                  |                                                                                                                                              |
| 9 Solvent                 | DMSO                                                                                                                                         |
| 10 Temperature            | 296.5                                                                                                                                        |
| 11 Pulse Sequence         | zg30                                                                                                                                         |
| 12 Number of Scans        | 16                                                                                                                                           |
| 13 Receiver Gain          | 144                                                                                                                                          |
| 14 Relaxation Delay       | 1.0000                                                                                                                                       |
| 15 Pulse Width            | 10.0000                                                                                                                                      |
| 16 Acquisition Time       | 4.0894                                                                                                                                       |
| 17 Acquisition Date       | 2019-05-16T16:15:09                                                                                                                          |
| 18 Modification Date      | 2019-05-16T16:15:09                                                                                                                          |
| 19 Spectrometer Frequency | 400.00                                                                                                                                       |
| 20 Spectral Width         | 8012.8                                                                                                                                       |
| 21 Lowest Frequency       | -1536.2                                                                                                                                      |
| 22 Nucleus                | 1H                                                                                                                                           |
| 23 Acquired Size          | 32768                                                                                                                                        |
| 24 Spectral Size          | 65536                                                                                                                                        |

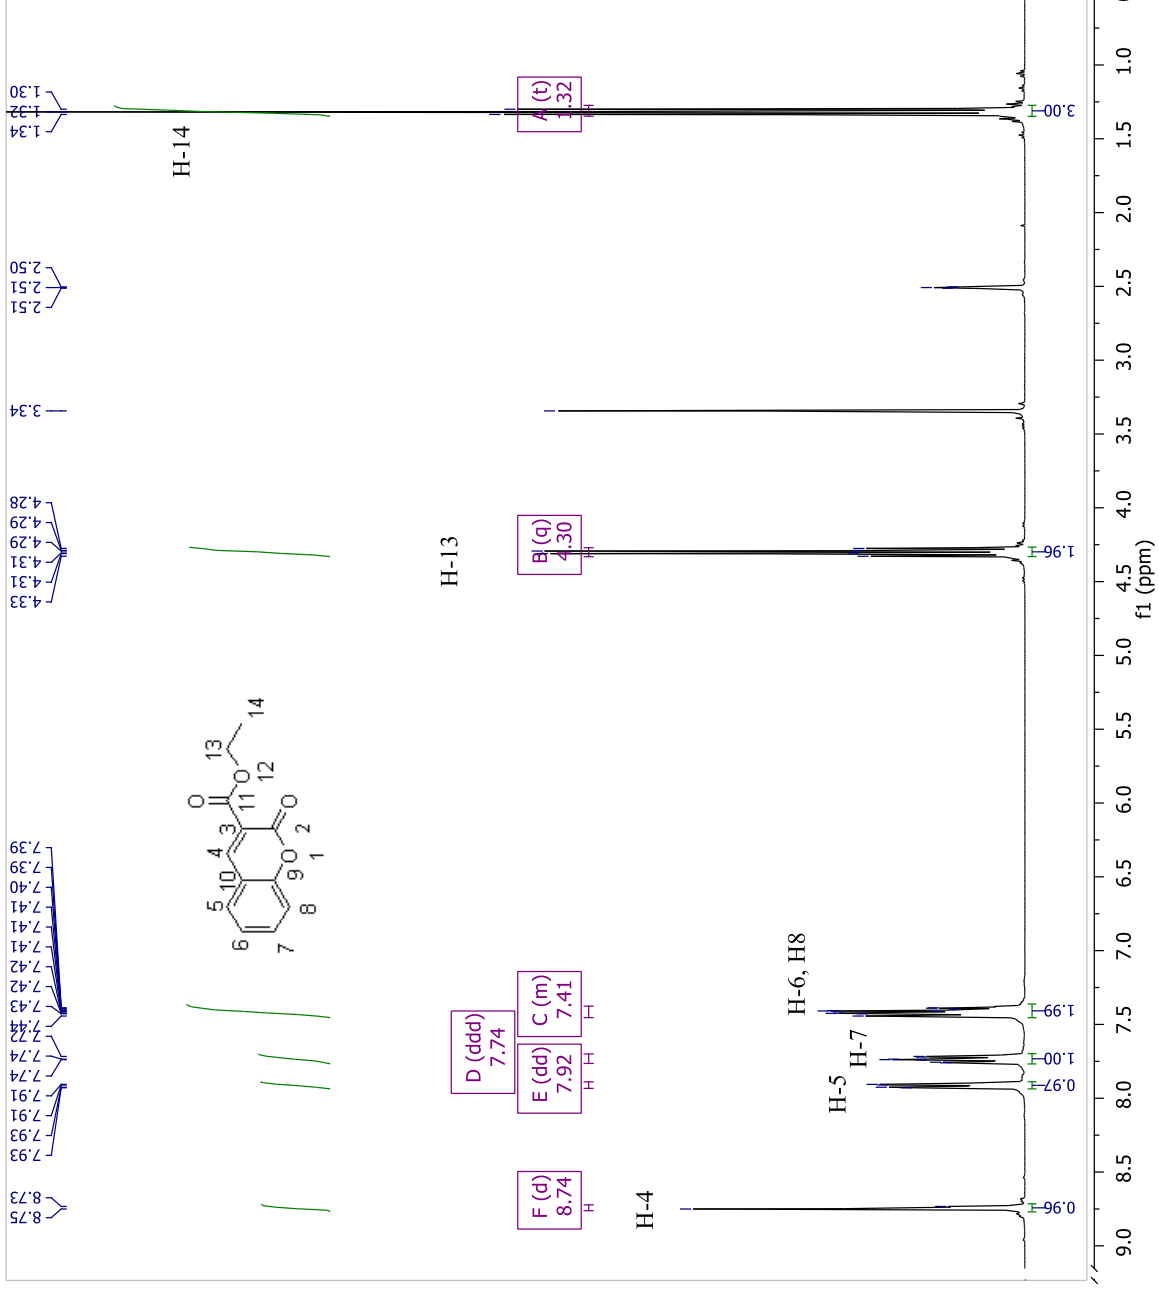

| Chemical Shift (ppm)               | Integration | Assignment                   |
|------------------------------------|-------------|------------------------------|
| 8.75                               | 0.96        | F (d) H                      |
| 7.93, 7.91, 7.91, 7.74, 7.74, 7.43 | 1.00        | D (ddd) H, E (dd) H, C (m) H |
| 7.42, 7.41, 7.41, 7.40, 7.39       | 1.99        | H-6, H8                      |
| 4.30                               | 1.96        | B (q) H                      |
| 1.39, 1.37, 1.34                   | 3.00        | A (t) H                      |

| Parámetro                 | Valor                                                                                                                |
|---------------------------|----------------------------------------------------------------------------------------------------------------------|
| 1 Data File Name          | E:/ Cesar Villa/ Documents/ Posgrado/ Proyecto de cumarinas/ Revisar 160519/ CAVM-Cum-Etox-H - 160519 - Copy/ 2/ fid |
| 2 Title                   | CAVM-Cum-Etox-H - 160519 - Copy                                                                                      |
| 3 Comment                 | 13C-CAVM                                                                                                             |
| 4 Origin                  | Bruker BioSpin GmbH                                                                                                  |
| 5 Owner                   | ARO                                                                                                                  |
| 6 Site                    |                                                                                                                      |
| 7 Spectrometer            | spect                                                                                                                |
| 8 Author                  |                                                                                                                      |
| 9 Solvent                 | DMSO                                                                                                                 |
| 10 Temperature            | 298.4                                                                                                                |
| 11 Pulse Sequence         | zgpg30                                                                                                               |
| 12 Number of Scans        | 551                                                                                                                  |
| 13 Receiver Gain          | 2050                                                                                                                 |
| 14 Relaxation Delay       | 2.0000                                                                                                               |
| 15 Pulse Width            | 10.0000                                                                                                              |
| 16 Acquisition Time       | 1.3631                                                                                                               |
| 17 Acquisition Date       | 2019-05-16T16:52:14                                                                                                  |
| 18 Modification Date      | 2019-05-16T16:52:14                                                                                                  |
| 19 Spectrometer Frequency | 100.58                                                                                                               |
| 20 Spectral Width         | 24038.5                                                                                                              |
| 21 Lowest Frequency       | -1961.7                                                                                                              |
| 22 Nucleus                | <sup>13</sup> C                                                                                                      |
| 23 Acquired Size          | 32768                                                                                                                |
| 24 Spectral Size          | 65536                                                                                                                |

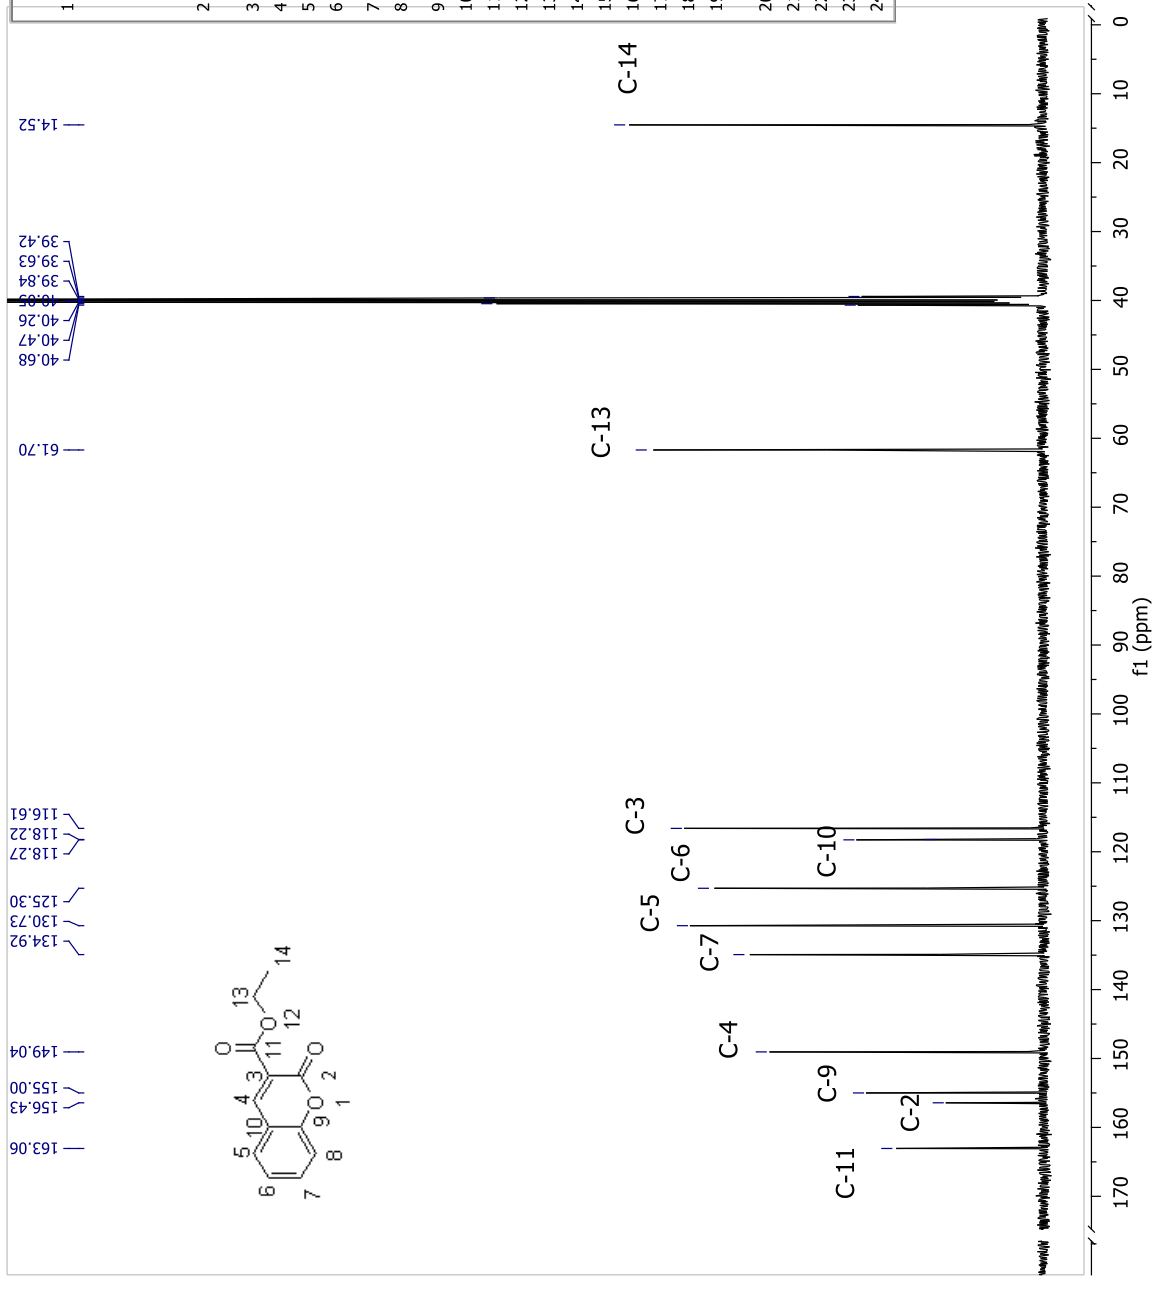

**2a**

| Parámetro                 | Valor                                                                                                                    |
|---------------------------|--------------------------------------------------------------------------------------------------------------------------|
| 1 Data File Name          | E:/ Cesar Villa/ Documents/ Posgrado/ Proyecto de posgrado/ Espectros de cumarinas/ Para tesis/ CAVM - R4-190918/ 1/ fid |
| 2 Title                   | CAVM - R4-190918                                                                                                         |
| 3 Comment                 | 1H                                                                                                                       |
| 4 Origin                  | Bruker BioSpin GmbH                                                                                                      |
| 5 Owner                   | ARO                                                                                                                      |
| 6 Site                    |                                                                                                                          |
| 7 Spectrometer            | spect                                                                                                                    |
| 8 Author                  |                                                                                                                          |
| 9 Solvent                 | MeOD                                                                                                                     |
| 10 Temperature            | 296.8                                                                                                                    |
| 11 Pulse Sequence         | zg30                                                                                                                     |
| 12 Number of Scans        | 16                                                                                                                       |
| 13 Receiver Gain          | 287                                                                                                                      |
| 14 Relaxation Delay       | 1.0000                                                                                                                   |
| 15 Pulse Width            | 10.0000                                                                                                                  |
| 16 Acquisition Time       | 4.0894                                                                                                                   |
| 17 Acquisition Date       | 2018-09-19T11:20:22                                                                                                      |
| 18 Modification Date      | 2018-09-19T11:20:23                                                                                                      |
| 19 Spectrometer Frequency | 400.00                                                                                                                   |
| 20 Spectral Width         | 8012.8                                                                                                                   |
| 21 Lowest Frequency       | -1536.2                                                                                                                  |
| 22 Nucleus                | 1H                                                                                                                       |
| 23 Acquired Size          | 32768                                                                                                                    |
| 24 Spectral Size          | 65536                                                                                                                    |

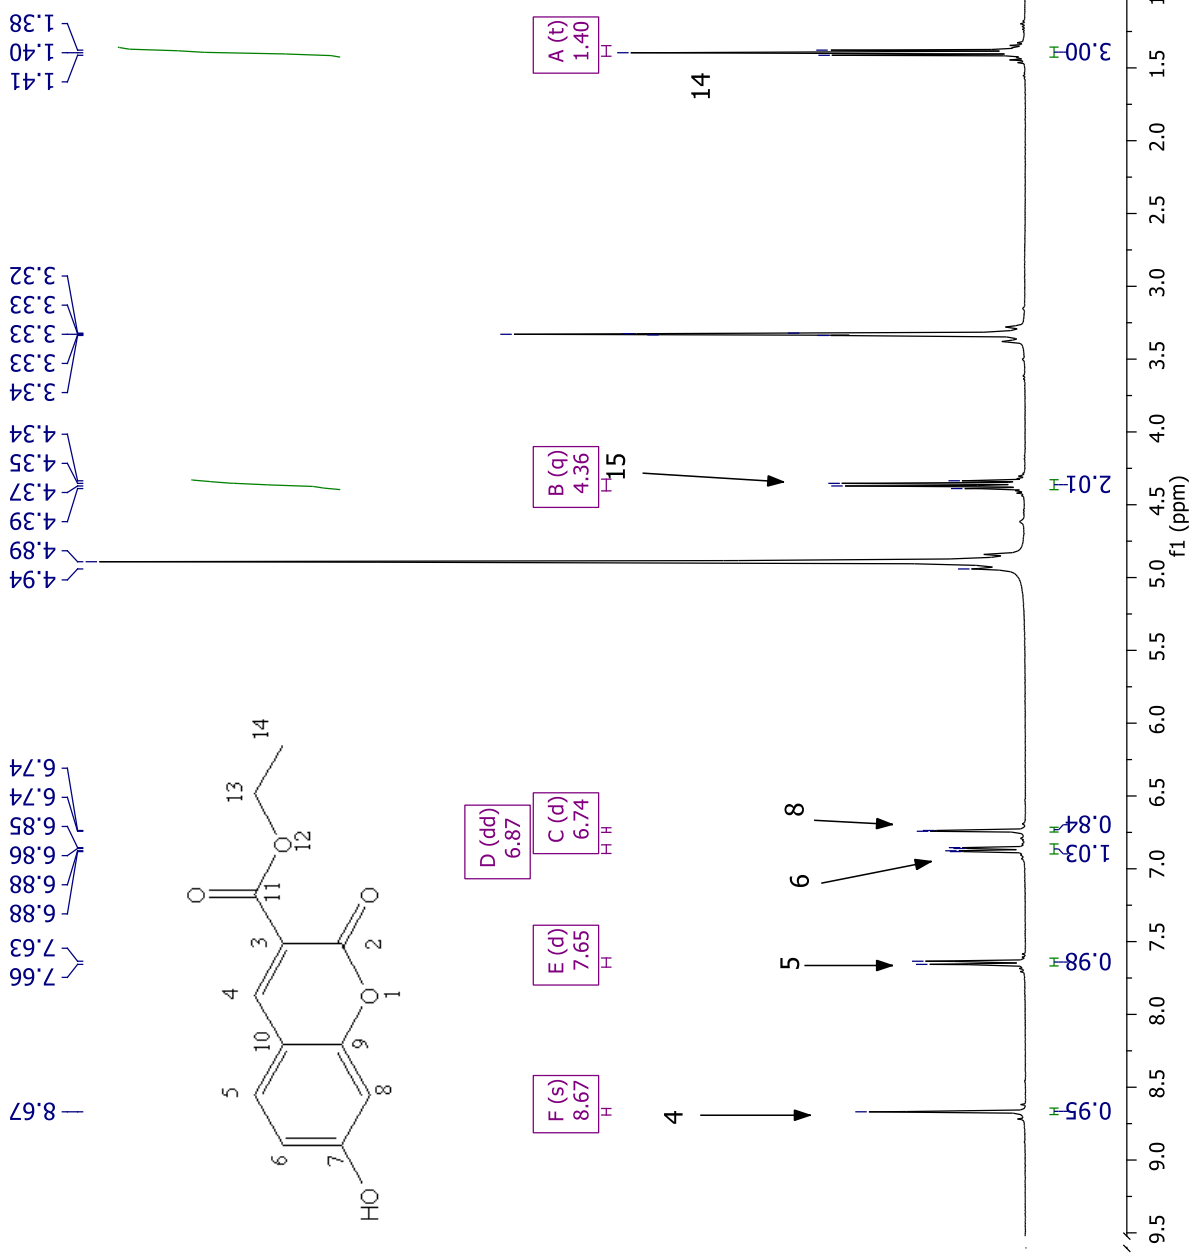

| Parámetro                 | Valor                                                                                             |
|---------------------------|---------------------------------------------------------------------------------------------------|
| 1 Data File Name          | E:/ Cesar Villa/ Documents/ Posgrado/ Proyecto de cumarinas/ Para tesis/ CAVM - R4-190918/ 2/ fid |
| 2 Title                   | CAVM - R4-190918                                                                                  |
| 3 Comment                 | 13C                                                                                               |
| 4 Origin                  | Bruker BioSpin GmbH                                                                               |
| 5 Owner                   | ARO                                                                                               |
| 6 Site                    | spect                                                                                             |
| 7 Spectrometer            |                                                                                                   |
| 8 Author                  |                                                                                                   |
| 9 Solvent                 | MeOD                                                                                              |
| 10 Temperature            | 299.3                                                                                             |
| 11 Pulse Sequence         | zpgg30                                                                                            |
| 12 Number of Scans        | 1024                                                                                              |
| 13 Receiver Gain          | 2050                                                                                              |
| 14 Relaxation Delay       | 2.0000                                                                                            |
| 15 Pulse Width            | 10.0000                                                                                           |
| 16 Acquisition Time       | 1.3631                                                                                            |
| 17 Acquisition Date       | 2018-09-19T12:26:14                                                                               |
| 18 Modification Date      | 2018-09-19T12:26:14                                                                               |
| 19 Spectrometer Frequency | 100.58                                                                                            |
| 20 Spectral Width         | 24038.5                                                                                           |
| 21 Lowest Frequency       | -1961.7                                                                                           |
| 22 Nucleus                | 13C                                                                                               |
| 23 Acquired Size          | 32768                                                                                             |
| 24 Spectral Size          | 65536                                                                                             |

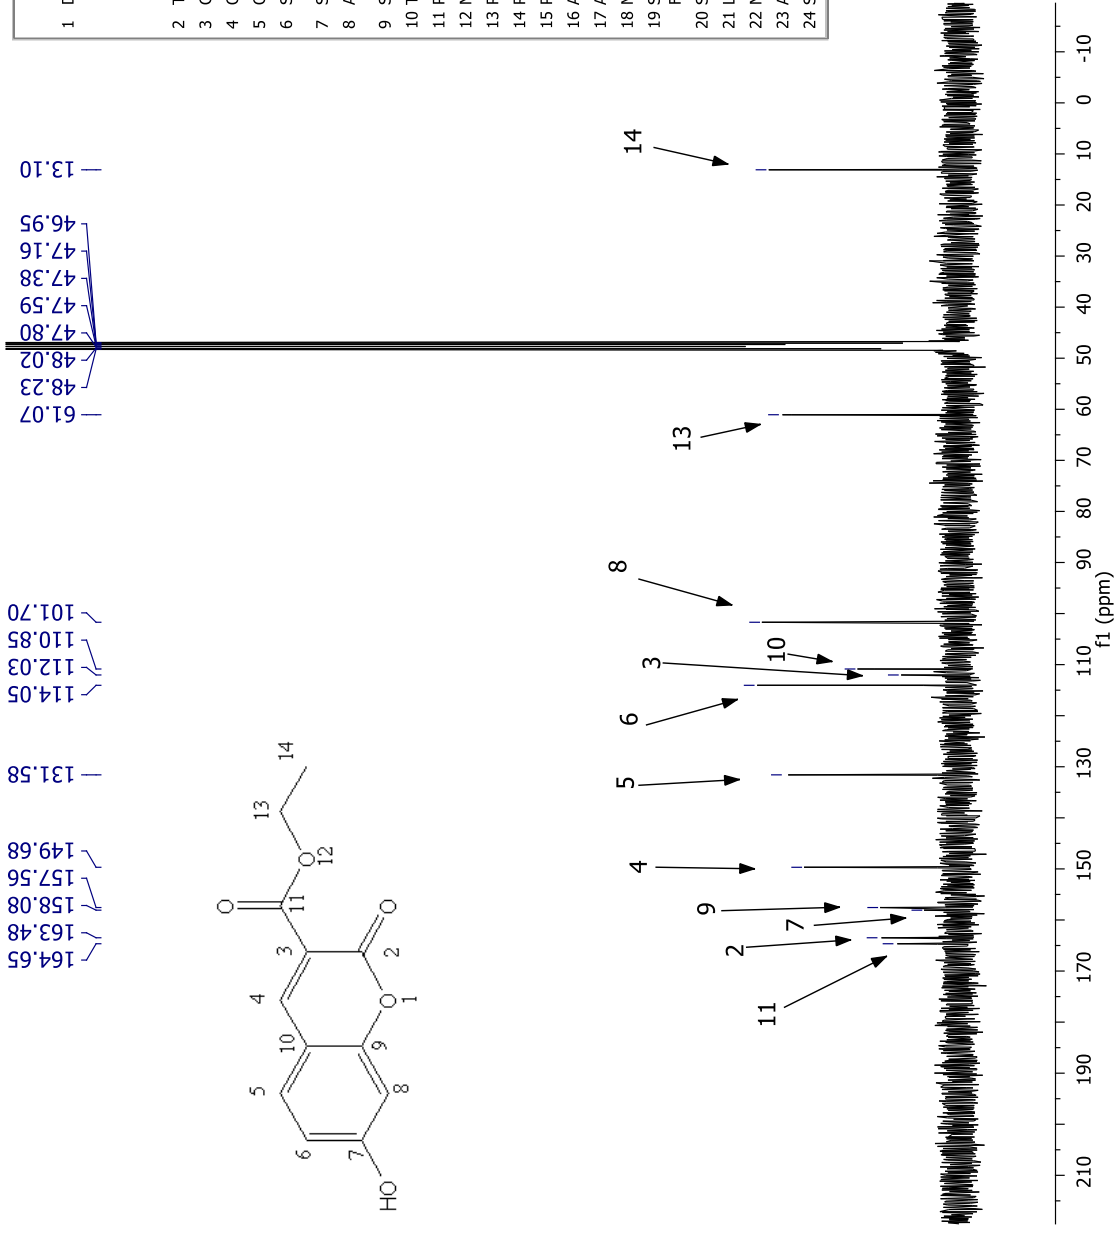



**3a**

| Parámetro                 | Valor                                                                                                                                                                               |
|---------------------------|-------------------------------------------------------------------------------------------------------------------------------------------------------------------------------------|
| 1 Data File Name          | E:/ Cesar Villa/ Documents/ Posgrado/ Proyecto de posgrado/ Espectros de cumarinas/ Para tesis/ Revisar 111018 para tesis cumarinas interpretar/ CAVM-Cum-OMe- Ester-111018/ 1/ fid |
| 2 Title                   | CAVM-Cum-OMe- Ester-111018                                                                                                                                                          |
| 3 Comment                 | 1H                                                                                                                                                                                  |
| 4 Origin                  | Bruker BioSpin GmbH                                                                                                                                                                 |
| 5 Owner                   | ARO                                                                                                                                                                                 |
| 6 Site                    |                                                                                                                                                                                     |
| 7 Spectrometer            | spect                                                                                                                                                                               |
| 8 Author                  |                                                                                                                                                                                     |
| 9 Solvent                 | DMSO                                                                                                                                                                                |
| 10 Temperature            | 302.3                                                                                                                                                                               |
| 11 Pulse Sequence         | zg30                                                                                                                                                                                |
| 12 Number of Scans        | 16                                                                                                                                                                                  |
| 13 Receiver Gain          | 128                                                                                                                                                                                 |
| 14 Relaxation Delay       | 1.0000                                                                                                                                                                              |
| 15 Pulse Width            | 10.0000                                                                                                                                                                             |
| 16 Acquisition Time       | 4.0894                                                                                                                                                                              |
| 17 Acquisition Date       | 2018-10-11T16:27:27                                                                                                                                                                 |
| 18 Modification Date      | 2018-10-11T16:27:27                                                                                                                                                                 |
| 19 Spectrometer Frequency | 400.00                                                                                                                                                                              |
| 20 Spectral Width         | 8012.8                                                                                                                                                                              |
| 21 Lowest Frequency       | -1536.2                                                                                                                                                                             |
| 22 Nucleus                | 1H                                                                                                                                                                                  |
| 23 Acquired Size          | 32768                                                                                                                                                                               |
| 24 Spectral Size          | 65536                                                                                                                                                                               |

1.29  
1.31  
1.32

3.33  
3.89  
4.25  
4.27  
4.28  
4.30

6.97  
6.98  
7.00

7.80

8.68

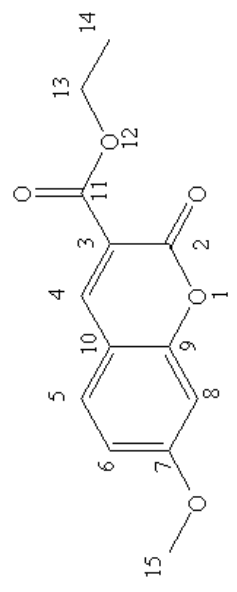

A (t) 1.31

B (s) 3.89  
C (q) 4.28

E (s) 7.00  
D (d) 6.97

F (d) 7.82

G (s) 8.68

14

15

13

8

6

5

4

3.00

2.89

2.09

0.52  
1.96  
1.39

0.92

1.01

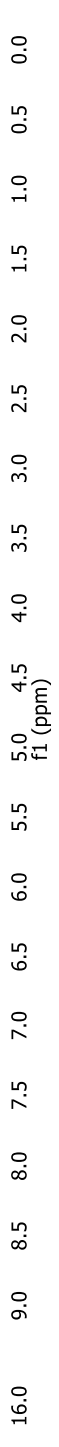

| Parámetro                 | Valor                                                                                                                                                                               |
|---------------------------|-------------------------------------------------------------------------------------------------------------------------------------------------------------------------------------|
| 1 Data File Name          | E:/ Cesar Villa/ Documents/ Posgrado/ Proyecto de posgrado/ Espectros de cumarinas/ Para tesis/ Revisar 111018 para tesis cumarinas interpretar/ CAVM-Cum-OMe- Ester-111018/ 2/ fid |
| 2 Title                   | CAVM-Cum-OMe- Ester-111018                                                                                                                                                          |
| 3 Comment                 | 13c                                                                                                                                                                                 |
| 4 Origin                  | Bruker BioSpin GmbH                                                                                                                                                                 |
| 5 Owner                   | ARO                                                                                                                                                                                 |
| 6 Site                    |                                                                                                                                                                                     |
| 7 Spectrometer            | spect                                                                                                                                                                               |
| 8 Author                  |                                                                                                                                                                                     |
| 9 Solvent                 | DMSO                                                                                                                                                                                |
| 10 Temperature            | 301.6                                                                                                                                                                               |
| 11 Pulse Sequence         | zgpg30                                                                                                                                                                              |
| 12 Number of Scans        | 195                                                                                                                                                                                 |
| 13 Receiver Gain          | 2050                                                                                                                                                                                |
| 14 Relaxation Delay       | 2.0000                                                                                                                                                                              |
| 15 Pulse Width            | 10.0000                                                                                                                                                                             |
| 16 Acquisition Time       | 1.3631                                                                                                                                                                              |
| 17 Acquisition Date       | 2018-10-11T16:54:20                                                                                                                                                                 |
| 18 Modification Date      | 2018-10-11T16:54:21                                                                                                                                                                 |
| 19 Spectrometer Frequency | 100.58                                                                                                                                                                              |
| 20 Spectral Width         | 24038.5                                                                                                                                                                             |
| 21 Lowest Frequency       | -1961.7                                                                                                                                                                             |
| 22 Nucleus                | <sup>13</sup> C                                                                                                                                                                     |
| 23 Acquired Size          | 32768                                                                                                                                                                               |
| 24 Spectral Size          | 65536                                                                                                                                                                               |

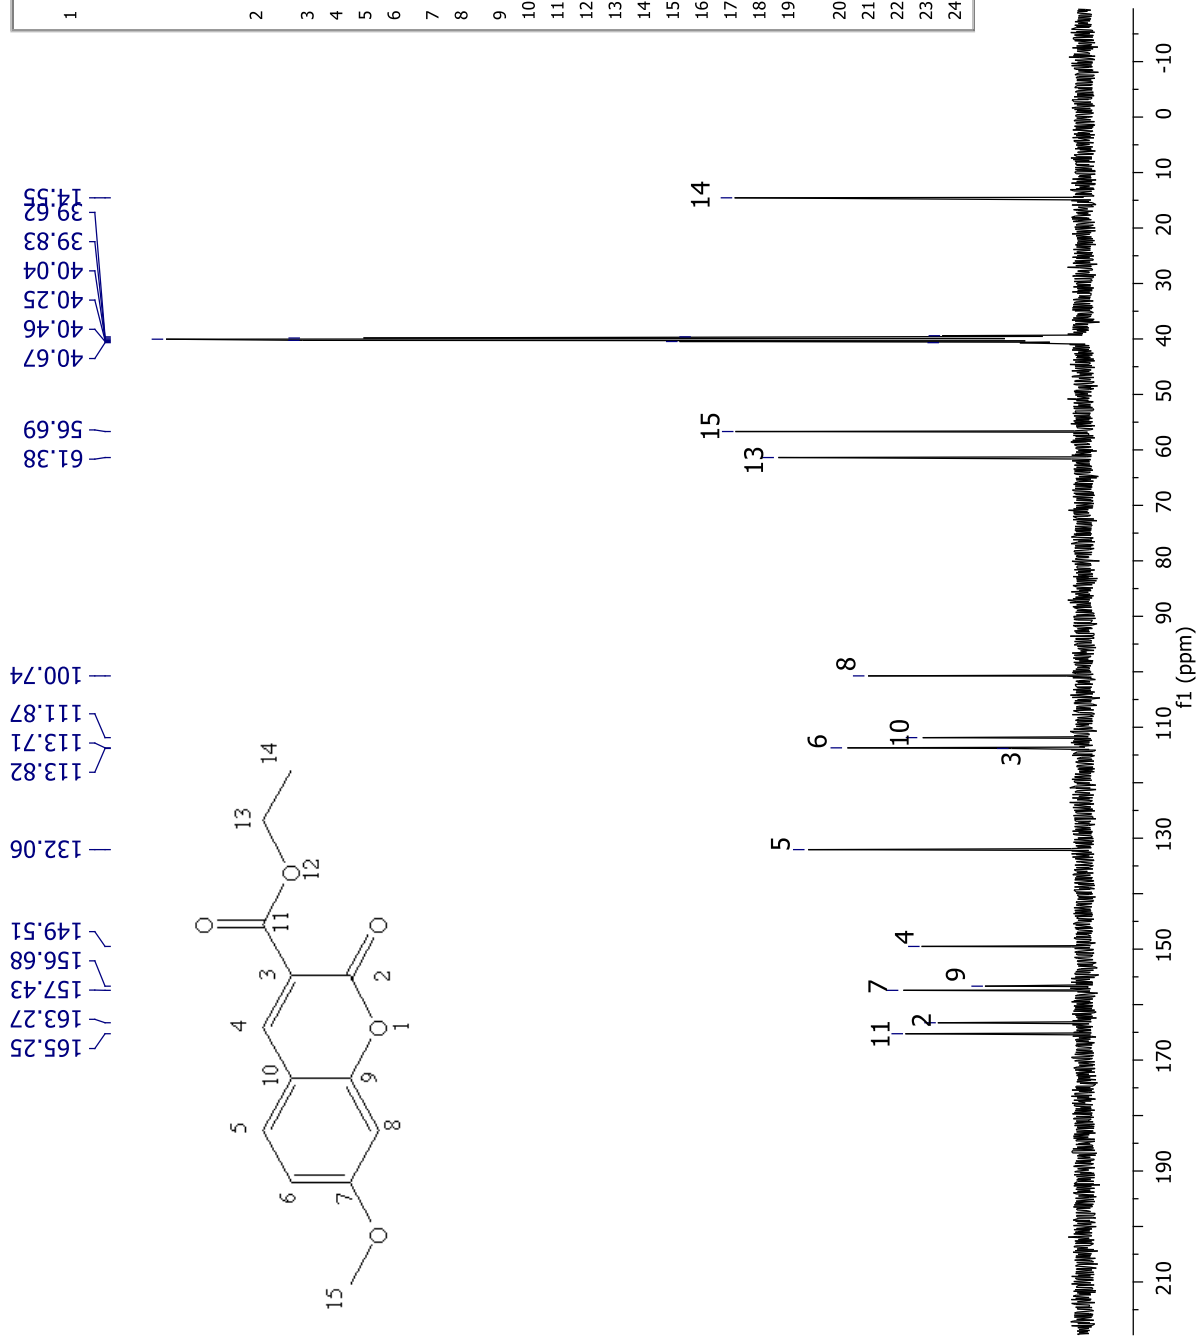

Supplement: d1nj01784e1.pdf [file d1nj01784e1.pdf]
